# Supplementary material for: Fecal glucocorticoid metabolite and T3 profiles of orphaned elephants differ from non-orphaned elephants in Zambia
Source: PeerJ. 2025 Apr 4;13:e19122. doi: 10.7717/peerj.19122 (PMC11974515; doi:10.7717/peerj.19122)
Supplement: Supplemental Information 1 [file peerj-13-19122-s001.xlsx]

## Sheet: Cleaned
ID	COLLECTION DATE	season	group	sex	Age	thyroid	cort	BCS	certainty score	age class	rescue_age	T_C
5	2021-06-19	0	0	2	84	51.9623	160.1	8	1	JUV		0.324562
6	2021-06-21	0	0	2	72	20.2402	77.63	7	1	JUV		0.260726
8	2021-06-21	0	0	2	180	34.6972	42.74	7	1	A		0.81182
9	2021-06-21	0	0	2	96	26.6626	62.92	7	1	JUV		0.423754
11	2021-06-21	0	0	0	108	194.762	113.06	5	3	SA		1.72264
12	2021-06-21	0	0	2	36	54.0957	65	7	1	INF		0.832241
13	2021-06-26	0	0	2	132	54.9452	137.88	5	1	SA		0.3985
14	2021-06-26	0	0	2	96	64.0224	50.09	6	1	JUV		1.27815
15	2021-06-26	0	0	1	4	59.4226	122.72	7	1	INF		0.484213
16	2021-06-26	0	0	2	24	92.7196	189.99	4	1	INF		0.488024
17	2021-06-30	0	0	2	144	60.3286	39.34	8	1	SA		1.53352
18	2021-06-30	0	0	2	84	28.6031	40.7	6	1	JUV		0.702778
23	2021-07-03	0	0	2	120	54.3455	65.25	7	3	SA		0.832882
24	2021-07-03	0	0	2	60	48.3648	38.93	7	1	JUV		1.24235
26	2021-07-03	0	0	2	96	72.9917	116.2	7	3	JUV		0.628156
32	2021-07-09	0	0	1	168	89.7168	39.19		1	SA		2.28928
33	2021-07-09	0	0	1	132	209.164	121.33	6	3	SA		1.72393
34	2021-07-09	0	0	0	132	205.863	145.62	5	3	SA		1.4137
40	2021-07-10	0	0	2	5	53.5623	27.27		1	INF		1.96415
41	2021-07-10	0	0	2	132	14.0344	55.23		1	SA		0.254109
42	2021-07-10	0	0	2	96	143.087	159.4		1	JUV		0.89766
43	2021-07-10	0	0	2	120	28.5821	93.9		1	SA		0.304388
44	2021-07-10	0	0	2	108	39.8242	98.9		1	SA		0.402672
45	2021-07-10	0	0	2	24	98.3857	151.48		1	SA		0.649496
46	2021-07-10	0	0	2	60	74.9442	168.73		1	JUV		0.444166
48	2021-07-22	0	0	2	96	132.257	89.93	5	1	JUV		1.47066
49	2021-07-22	0	0	1	132	124.928	76.22	8	3	SA		1.63904
50	2021-07-22	0	0	0	84	320.165	85.48	6	3	JUV		3.74549
51	2021-07-22	0	0	0	120	84.7277	179.314	8	3	SA		0.47251
52	2021-07-22	0	0	2	72	76.2234	140.47	7	1	JUV		0.542631
53	2021-07-22	0	0	1	8	127.347	168.45	6	2	INF		0.755995
54	2021-07-22	0	0	2	84	40.6225	108.1	6	1	JUV		0.375786
55	2021-07-22	0	0	2	72	159.708	132.6		1	JUV		1.20444
57	2021-07-23	0	0	2	120	72.7855	133.8		1	SA		0.543987
58	2021-07-24	0	0	2	72	91.0743	157.73		1	JUV		0.577406
59	2021-07-24	0	0	2	72	163.438	188.103		1	JUV		0.868878
60	2021-07-26	0	0	1	24	113.392	39.66	7	3	INF		2.8591
61	2021-07-26	0	0	2	18	84.1935	121	8	1	INF		0.695814
62	2021-07-26	0	0	2	96	40.6982	34.18	8	1	JUV		1.1907
63	2021-07-26	0	0	2		108.713	118.116	8	1	.		0.920393
64	2021-07-28	0	0	1	36	108.082	36.93	6	3	INF		2.92667
65	2021-07-28	0	0	1	168	62.4896	127.35	6	3	SA		0.490691
67	2021-07-28	0	0	2	84	51.6287	86.7	5	1	JUV		0.595486
68	2021-07-28	0	0	2	144	39.9201			1	SA		#DIV/0!
69	2021-07-28	0	0	0	132	74.8412	128	8	1	SA		0.584697
70	2021-07-28	0	0	2	96	74.6687	154.29	3	1	JUV		0.48395
71	2021-07-28	0	0	2	108		136.22		1	SA		0
72	2021-07-28	0	0	2	84	12.4201	117.4	5	1	JUV		0.105793
73	2021-07-28	0	0	0	108	90.7566	105.96	5	3	SA		0.856518
74	2021-07-28	0	0	2	84	118.3	160.59	8	1	JUV		0.736661
75	2021-07-29	0	0	2	84	92.5258	173.37	6	1	JUV		0.53369
76	2021-07-30	0	0	0	72	132.12	106.45		3	JUV		1.24114
77	2021-07-31	0	0	0	8	60.1859	45.45		1	INF		1.32422
79	2021-07-31	0	0	0	144	179.277	82.26		3	SA		2.17939
80	2021-07-31	0	0	2	84	12.9113	14.54		1	JUV		0.887984
81	2021-07-31	0	0	2	60	39.0777	152.4		1	JUV		0.256415
82	2021-07-31	0	0	2	60	144.966	42.76		1	JUV		3.39022
83	2021-07-31	0	0	2	120	121.912	42.58		1	SA		2.86313
85	2021-09-04	1	0	2	24	87.9231	50.94		1	INF		1.72601
86	2021-09-04	1	0	2	96	28.4558	49.21		1	JUV		0.578253
87	2021-09-06	1	0	1	60	50.5185	30.06	6	3	JUV		1.68059
88	2021-09-06	1	0	1	132	80.9804	41.16	6	3	SA		1.96745
89	2021-09-06	1	0	0	144	36.9882	42.27	6	3	SA		0.875045
90	2021-09-06	1	0	2	120	18.0922	72.768	7	1	SA		0.248629
91	2021-09-06	1	0	2	120	41.9842	72.95		1	SA		0.575521
95	2021-09-11	1	0	2	72	35.8279	78.92		3	JUV		0.453977
96	2021-09-17	1	0	2	48	40.5083	38.9		1	INF		1.04134
101	2021-10-07	1	0	2	18	25.6382	25.1		1	INF		1.02144
105	2021-10-08	1	0	1	72	84.5001	31.18	6	3	JUV		2.71008
107	2021-10-13	1	0	0	168	268.839	67.6		3	SA		3.97691
108	2021-10-15	1	0	2	108	206.924	56.19		3	SA		3.68258
111	2021-10-15	1	0	2	168	295.635	58.71		3	SA		5.03552
112	2021-10-15	1	0	2	168	181.801	197.28		3	SA		0.921539
113	2021-10-15	1	0	2	120	195.013	98.87	4	3	SA		1.97242
115	2021-10-15	1	0	2	168	133.939	152.73	6	3	SA		0.876963
116	2021-10-16	1	0	2	120	266.414	32.36		3	SA		8.23283
117	2021-10-16	1	0	2	84	179.143	40.48	4	3	JUV		4.42548
118	2021-10-16	1	0	2	60	55.879	92.432	7	1	JUV		0.604541
123	2021-10-25	1	0	0	72	157.833	55.45	5	3	JUV		2.8464
124	2021-10-25	1	0	2	84	288.753	159.17	4	3	JUV		1.81411
Batoka	2021-06-11	0	1	0	158	207.107	110.975	5	3	SA	18	1.86625
Chamilandu	2021-07-15	0	1	1	183	109.057	42.83	8	3	A	18	2.54627
Chamilandu	2021-10-06	1	1	1	186	431.315	36.93	7	3	A	18	11.6793
Chipembele	29/10/21	1	1	0	24	119.462	63.35		3	INF	24	1.88575
Fungulani	2021-11-03	1	1	1	48	42.7125	51.31		3	INF	11	0.832439
Fungulani	2021-06-30	0	1	1	45	310.242	206.53	7	3	INF	11	1.50216
Kasewe	16/10/21	1	1	1	70	301.194	169.9	4	3	JUV	9	1.77277
Kasewe	2021-07-22	0	1	1	67	335.764	82.5	4	3	JUV	9	4.06987
Kavala	2021-10-15	1	1	1	133	277.876	99.27	7	3	SA	10	2.79919
Kavala	2021-07-15	0	1	1	130	216.94	57.3	5	3	SA	10	3.78604
Ludaka	2021-07-14	0	1	0	51	315.924	87.63	6	3	JUV	30	3.6052
Ludaka	2021-10-15	1	1	0	54	340.329	147.02	3	3	JUV	30	2.31485
Lufutuko	2021-10-15	1	1	1	46	473.772	122.13	7	3	INF	6	3.87924
Lufutuko	2021-07-17	0	1	1	43	495.148	85.67	5	3	INF	6	5.77971
Maramba	2021-07-16	0	1	0	136	357.281	76.27		3	SA	18	4.68442
Maramba	2021-11-05	1	1	0	139	273.479	90.35	5	3	SA	18	3.02689
Mbila	29/10/21	1	1	1	20	89.898	107.86		3	INF	4	0.833469
Mbila	2021-06-30	0	1	1	17	111.265	189.144	7	3	INF	4	0.588257
Mkaliva	2021-07-14	0	1	1	63	227.024	36.7		3	JUV	15	6.18593
Mkaliva	2021-10-13	1	1	1	66	196.999	83.03	8	3	JUV	15	2.37263
Mosi	2021-07-14	0	1	0	132	339.071	57.54	7	3	SA	24	5.89279
Mosi	2021-10-15	1	1	0	135	379.466	41.6	5	3	SA	24	9.12177
Mphamvu	2021-07-14	0	1	0	113	502.862	108.28	7	3	SA	18	4.64409
Mphamvu	29/10/21	1	1	0	116	353.398	158.5	5	3	SA	18	2.22964
Muchichili	16/10/21	1	1	0	88	362.343	220.59	6	3	JUV	18	1.64261
Muchichili	2021-07-14	0	1	0	85	258.029	73	6	3	JUV	18	3.53464
Mulisani	2021-07-15	0	1	0	78	347.517	80.87		3	JUV	30	4.29722
Mulisani	2021-10-15	1	1	0	75	176.893	111.92	5	3	JUV	30	1.58053
Musolole	2021-07-14	0	1	0	123	321.081	59.7		3	SA	5	5.37824
Musolole	15/10/21	1	1	0	126	300.266	66.37	8	3	SA	5	4.52412
Nkala	2021-10-20	1	1	0	104	292.368		7	3	SA	3	#DIV/0!
Nkala	2021-07-14	0	1	0	101	421.327	65.17	7	3	SA	3	6.46505
Olimba	29/10/21	1	1	1	36	195.216	88.7		3	INF	12	2.20086
Olimba	2021-06-30	0	1	1	33	151.369	200.7	6	3	INF	12	0.754206
Rufunsa	2021-07-14	0	1	0	134	159.382	151.67	5	3	SA	3	1.05085
Rufunsa	2021-10-06	1	1	0	137	229.928	24.86	5	3	SA	3	9.24892
Tafika	2021-07-19	0	1	0	153	77.0342	76.613		3	SA	9	1.0055
Tafika	2021-10-20	1	1	0	156	486.88	73.9		3	SA	9	6.58836
Zongo	29/10/21	1	1	0	19	162.174	52.98		3	INF	3	3.06105
Zongo	2021-07-01	0	1	0	16	120.556	298	4	3	INF	3	0.40455

## Sheet: Data dictionary
ID	collection date	season	group	sex	age	thyroid	cort	BCS	certainty score	age class	rescue_age	T_C
elephant ID	when dung was collected	early dry=0	wild=0	male=0	months	ng/g DW	ng/g DW	0-9	1=dung sample is known only at the herd level	inf=infant	months	Ratio of thyroid hormone to cort
	dd/mm/yy	late dry=1	orphan=1	female=1					2= assumed individual defecated, but was not observed	juv=juvenile	age at rescue
				unknown=2					3=sample collected from an individual observed defecating	sa=subadult
										a=adult
